# Supplementary material for: Feasibility and impact of data-driven learning within the suicide prevention action network of thirteen specialist mental healthcare institutions (SUPRANET Care) in the Netherlands: a study protocol
Source: PubMed Central journal article supplement — BMJ Open. 2018 Aug 20;8(8):e024398. doi: 10.1136/bmjopen-2018-024398 (PMC6104797; doi:10.1136/bmjopen-2018-024398), 2018-08-20
Supplement: bmjopen-2018-024398.draft_revisions.pdf [file bmjopen-2018-024398.draft_revisions.pdf]

# BMJ Open

BMJ Open is committed to open peer review. As part of this commitment we make the peer review history of every article we publish publicly available.

When an article is published we post the peer reviewers' comments and the authors' responses online. We also post the versions of the paper that were used during peer review. These are the versions that the peer review comments apply to.

The versions of the paper that follow are the versions that were submitted during the peer review process. They are not the versions of record or the final published versions. They should not be cited or distributed as the published version of this manuscript.

BMJ Open is an open access journal and the full, final, typeset and author-corrected version of record of the manuscript is available on our site with no access controls, subscription charges or pay-per-view fees (<http://bmjopen.bmj.com>).

If you have any questions on BMJ Open's open peer review process please email [info.bmjopen@bmj.com](mailto:info.bmjopen@bmj.com)

# BMJ Open

## Feasibility and impact of data-driven learning within the suicide prevention action network of thirteen specialist mental healthcare institutions (SUPRANET Care) in the Netherlands: A study protocol

|                               |                                                                                                                                                                                                                                                                                                                                                                                                                                                                                                                                                                                                                                                                                                                                                                                                       |
|-------------------------------|-------------------------------------------------------------------------------------------------------------------------------------------------------------------------------------------------------------------------------------------------------------------------------------------------------------------------------------------------------------------------------------------------------------------------------------------------------------------------------------------------------------------------------------------------------------------------------------------------------------------------------------------------------------------------------------------------------------------------------------------------------------------------------------------------------|
| Journal:                      | <i>BMJ Open</i>                                                                                                                                                                                                                                                                                                                                                                                                                                                                                                                                                                                                                                                                                                                                                                                       |
| Manuscript ID                 | bmjopen-2018-024398                                                                                                                                                                                                                                                                                                                                                                                                                                                                                                                                                                                                                                                                                                                                                                                   |
| Article Type:                 | Protocol                                                                                                                                                                                                                                                                                                                                                                                                                                                                                                                                                                                                                                                                                                                                                                                              |
| Date Submitted by the Author: | 06-Jun-2018                                                                                                                                                                                                                                                                                                                                                                                                                                                                                                                                                                                                                                                                                                                                                                                           |
| Complete List of Authors:     | Setkowski, Kim; 113 Suicide Prevention<br>Mokkenstorm, Jan; 113 Suicide Prevention; Amsterdam Public Health research institute, VU University Medical Center and GGZinGeest, Department of Psychiatry<br>van Balkom, Anton; Amsterdam Public Health research institute, VU University Medical Center and GGZinGeest, Department of Psychiatry<br>Franx, Gerdien ; 113 Suicide Prevention<br>Verbeek- van Noord, Inge; 113 Suicide Prevention<br>Dongelmans, Dave; Academic Medical Center, University of Amsterdam, Department of Intensive Care Medicine; National Intensive Care Evaluation (NICE) foundation<br>Eikelenboom, Merijn; Amsterdam Public Health research institute, VU University Medical Center and GGZinGeest, Department of Psychiatry<br>Gilissen, Renske; 113 Suicide Prevention |
| Keywords:                     | suicide, suicide attempt, implementation study, guideline, quality of care, mental health care                                                                                                                                                                                                                                                                                                                                                                                                                                                                                                                                                                                                                                                                                                        |
|                               |                                                                                                                                                                                                                                                                                                                                                                                                                                                                                                                                                                                                                                                                                                                                                                                                       |

SCHOLARONE™  
Manuscripts

1  
2  
3 **Feasibility and impact of data-driven learning within the suicide prevention action network of**  
4 **thirteen specialist mental healthcare institutions (SUPRANET Care) in the Netherlands: A study**  
5 **protocol**  
6  
7

8  
9 **Authors:** Kim Setkowski <sup>1,\*</sup>, Jan Mokkenstorm <sup>1,2</sup>, Anton J.L.M. van Balkom <sup>2</sup>, Gerdien Franx <sup>1</sup>,  
10 Inge Verbeek- van Noord <sup>1</sup>, Dave. A. Dongelmans <sup>3,4</sup>, Merijn Eikelenboom <sup>2</sup> and Renske Gilissen <sup>1</sup>  
11  
12  
13

14  
15  
16 <sup>1</sup> 113 Suicide Prevention, Amsterdam, The Netherlands; j.mokkenstorm@113.nl (J.M.);  
17 g.franx@113.nl (G.F.); i.verbeek@113.nl (I.V.); r.gilissen@113.nl (R.G.)  
18  
19

20 <sup>2</sup> Department of Psychiatry, Amsterdam Public Health research institute, VU University Medical  
21 Center and GGZinGeest, Amsterdam, The Netherlands; t.balkom@ggzingeest.nl (T.v.B.);  
22 m.eikelenboom@ggzingeest.nl (M.E.)  
23  
24

25  
26 <sup>3</sup> Department of Intensive Care Medicine, Academic Medical Center, University of Amsterdam, The  
27 Netherlands; d.a.dongelmans@amc.uva.nl (D.D.)  
28  
29

30 <sup>4</sup> National Intensive Care Evaluation (NICE) foundation, Amsterdam, The Netherlands  
31  
32  
33

34 \* Correspondence: k.setkowski@113.nl  
35  
36  
37

38 **Abstract**  
39

40 **Introduction:** Improvement of the quality and safety of care is associated with lower suicide rates  
41 among mental health care patients. In the Netherlands about 40% of all people that die by suicide is in  
42 specialist mental health care. Unfortunately, the degree of implementation of suicide prevention  
43 policies and best practices within mental health care services in the Netherlands is variable. Sharing  
44 and comparing outcome and performance data in confidential networks of professionals working in  
45 different organizations can be effective in reducing practice variability within and across organizations  
46 and improving the quality of care. Suicide is a relatively rare event compared to the prevalence of its  
47 known risk factors. Learning to prevent this outcome requires a database large enough to allow for  
48  
49  
50  
51  
52  
53  
54  
55  
56  
57  
58  
59  
60

1  
2  
3 reliable and meaningful analyses that can be studied and discussed in an atmosphere of mutual trust  
4 and confidentiality.  
5

6  
7 **Methods and Analysis:** Using formats of professional networks to improve surgical care (DICA) and  
8 somatic intensive care (NICE), 113 Suicide Prevention has taken the lead in the formation of a Suicide  
9 Prevention Action Network (SUPRANET Care) in mental health care. At present, thirteen large  
10 specialist mental health institutions in the Netherlands govern and participate in this network.  
11 Implementation and data collection take place after consensus rounds in which key professionals  
12 participate to define what data are relevant to collect, how they are operationalized, retrieved and will  
13 be analyzed. This paper describes the planned activities of SUPRANET Care and the evaluation of its  
14 feasibility, possible relevance and impact for the field of suicide prevention.  
15  
16  
17  
18  
19  
20  
21  
22

23  
24 **Ethics and dissemination:** This study has been approved by the Central Committee on Research  
25 Involving Human Subjects, the Netherlands. This study does not fall under the scope of the Medical  
26 Research Involving Human Subjects Act (WMO).  
27  
28  
29  
30

31 **Study registration number:** 537001006 and funded by the Ministry of Health Funding-program for  
32 Health Care Efficiency Research (ZonMw).  
33  
34  
35

#### 36 **Strengths and limitations of this study:**

37 \* Possible gains that could be achieved with optimal implementation of suicide prevention  
38 recommendations are currently not reached. SUPRANET Care is a project actively improving the  
39 quality of care to prevent suicide. The SUPRANET network started January 2016 as a long-term  
40 project. Innovative activities of SUPRANET Care for mental health care organizations are:  
41  
42  
43  
44  
45

- 46  
47  
48 ○ a unique collaboration of mental health organizations based on a strong mutual ambition to  
49 achieve better compliance to suicide prevention guidelines, increased patient safety and lower  
50 suicide rates;
- 51  
52  
53 ○ sharing of data on a core set of quality indicators derived from the Dutch multidisciplinary  
54 guideline which are jointly chosen, operationalized, defined, and registered;  
55  
56  
57  
58  
59

- national registry with pooled data on suicide (attempts) and their determinants, and on service quality indicators to provide meaningful data on successful approaches to prevent suicide in mental health care.
- standardized suicide (attempt/mortality) rates, allowing for benchmark comparisons between and within organizations; and for monitoring changes in service provision.
- direct relevance to practice. Biannual feedback to the institutions using feedback reports, along with guided improvement in the participating institutions in response to the feedback reports makes that mental health organizations and practitioners can immediately use the results in their practice.
- long-term effects. SUPRANET Care launched with thirteen mental health institutions across the country. Other mental health institutions have also indicated their intention to join. Aim of SUPRANET Care is an enduring national suicide registry.

\* Due to the aggregation of the collected patient and treatment data to protect the privacy of patients, it is not possible to decrypt personal patient information to follow patients in time.

**Keywords:** suicide; suicide attempt; implementation study; guideline; quality of care; mental health care

## Introduction

Mental health problems are important risk factors for suicide and suicidal behavior<sup>1-3</sup>. Many patients with psychiatric disorders, like mood-, anxiety-, and personality disorders also suffer from suicidal ideation that may lead to self-harming behaviors or to suicide<sup>4,5</sup>. This makes suicide prevention a core component and responsibility of health care services, in particular of those working in the field of behavioral and specialist mental health<sup>6</sup>. In the Netherlands about 40% of all people that die by suicide is in specialist mental health care<sup>7</sup>.

The implementation of guideline best practices appears to be of paramount importance in preventing suicide among patients in health care. A recent large-scale UK study showed that the

1  
2  
3 implementation of service guideline recommendations significantly reduced the suicide rate with more  
4 than two suicides per 10.000 patient contacts<sup>8</sup>. Kapur et al<sup>9</sup> demonstrated a 20-30% reduction of  
5 suicide rates in mental health services in England associated with sixteen specific service  
6 improvements and implementation of guideline recommendations. In 2012, the Dutch  
7 multidisciplinary guideline for the diagnosis and treatment of suicidal behavior was published<sup>10</sup>, but  
8 its uptake by the field is problematic with marked degrees of variation of suicide prevention policies  
9 and practices in mental health care institutions across the country<sup>11</sup>. To promote its implementation a  
10 one-day training program was developed and tested with significant positive effects on professionals'  
11 competences and attitude towards guideline best practices<sup>12</sup>. To date, the majority of specialist mental  
12 health workers have not partaken in this training. These observations illustrate that guideline  
13 implementation and quality improvement can be difficult<sup>13 14</sup>.

24 Although suicide is a relatively common cause of death in the high-risk population of patients  
25 in specialist mental health<sup>7 15</sup>, its population base rate is too low to assess the preventative impact of  
26 specific practices or routines within a single health care organization. Suicide attempts that have a  
27 much higher incidence rate are considered a valuable proxy outcome measure to evaluate the  
28 effectiveness of prevention and intervention<sup>16</sup>. Unfortunately, most mental health organizations in the  
29 Netherlands do not systematically register and analyze suicide attempts in their patient populations. To  
30 date, annual suicide numbers are collected on institutional and national levels for reporting purposes  
31 only<sup>15</sup>. Due to confounders and lack of standardized registration, these absolute numbers are not  
32 useful to drive learning and improvement. As a result, it is unclear to what extent the (lack of)  
33 implementation of guideline recommendations affect suicide and suicide attempt rates among patients  
34 in Dutch specialist mental health care.

46 Given growing concerns and waning acceptance of suicide as an outcome of mental health  
47 treatment among health care professionals and in Dutch society, guideline implementation has become  
48 a focal point of the national suicide prevention strategy<sup>17</sup>. Commissioned by the Ministry of Welfare,  
49 Health and Sports, 113 Suicide Prevention change agents monitored the degree of implementation of  
50 guideline-based policies in the largest 25 Dutch specialist mental health care organizations<sup>11</sup>. This  
51 resulted in growing awareness of their responsibility and potential to enhance suicide prevention  
52  
53  
54  
55  
56  
57  
58  
59

1  
2  
3 efforts. Bringing together leaders and key health care professionals within interested specialist mental  
4 health organizations, 113 proposed to form a Suicide Prevention Action Network in health care  
5 (SUPRANET Care). The SUPRANET Care program is modeled after successful examples in Dutch  
6 somatic health care: the Netherlands Intensive Care Evaluation (NICE) project and the Dutch Initiative  
7 for Clinical Auditing (DICA) network that showed improved quality of care as a result of benchmark  
8 feedback based on joint registration of standardized process- and outcome data. Within the NICE  
9 network<sup>18</sup>, more than 90 participant Intensive Care Units of general hospitals across the Netherlands  
10 share, evaluate and use registered data to improve the quality of care<sup>19</sup>. The DICA was founded with  
11 the objective to organize and support clinical audits by facilitating on legal, technical, methodological  
12 and logistic issues<sup>20</sup>. This has led to improved quality of care with reduced practice variance in the  
13 field of colorectal, pancreatic and cardiovascular surgery. Also, SUPRANET Care takes example after  
14 the successful implementation of treatment guidelines for anxiety disorders in the Netherlands. Van  
15 Dijk et al showed that a multilevel, multifaceted and systematic implementation strategy resulted in  
16 higher quality of care leading to earlier patient recovery compared to a treatment setting in which  
17 guidelines were passively disseminated<sup>21</sup>.

18  
19  
20  
21  
22  
23  
24  
25  
26  
27  
28  
29  
30  
31  
32  
33  
34  
35  
36  
37  
38  
39  
40  
41  
42  
43  
44  
45  
46  
47  
48  
49  
50  
51  
52  
53  
54  
55  
56  
57  
58  
59  
60  
SUPRANET Care aims at improving quality and safety of care to enhance suicide prevention  
by: 1) collecting standardized process, practice and suicide (attempt) outcome data, 2) providing  
benchmark feedback reports to participant organizations, 3) identifying trends and promising  
preventative practices, and 4) systematically implement these practices across the network. After due  
settlement of legal and logistic issues specifically pertaining to privacy and safety of the sharing of  
data, the SUPRANET Care Foundation was founded. The program's first data collection took place in  
2017. This paper describes the activities of SUPRANET Care and the evaluation of its feasibility and  
impact.

### **Suicide prevention action network (SUPRANET Care)**

SUPRANET Care is the confidential learning network of at present thirteen specialist mental  
health institutions in the Netherlands that share the ambition to optimize suicide prevention. Legally it  
is a non-profit foundation governed by a board that includes four senior psychiatrists (working as chief  
medical officers in participating organizations); a patient and family advocate; and two PhD level

1  
2  
3 quality improvement / implementation researchers and experts (the SUPRANET Care project leader  
4 and the chairman of the National Intensive Care Evaluation). Each participant organization has signed  
5 a contract pertaining to the confidential exchange and analysis of the data and pays an annual 10,000  
6 euro participation fee to the SUPRANET Care foundation. The board of the SUPRANET Care  
7 Foundation established two workgroups, the Quality of Care Group and the Registration Group, in  
8 which professionals recruited from the participant organizations participate. The first group is  
9 consulted on the quality of care indicators relevant and feasible to use in daily practice. The second  
10 group determines what data are relevant and feasible to collect, and how the data variables are  
11 operationalized and retrieved.  
12  
13  
14  
15  
16  
17  
18  
19  
20

### 21 **Multifaceted improvement program**

22  
23 A multifaceted benchmark and quality improvement program is offered to each participant  
24 containing the following three elements: (1) Biannual feedback reports with benchmark information  
25 based on data collected from all participating organizations. The feedback reports are generated by an  
26 analysis and support team of 113 Suicide Prevention and sent to and discussed with local suicide  
27 prevention teams within the organizations. (2) Improvement modules supported and initiated by the  
28 SUPRANET Care board. The aim is to develop strong multidisciplinary teams that continuously  
29 promote and monitor suicide prevention activities within the organizations. Ultimate goal is to create  
30 useful quality indicators that guide these teams. The third element (3) concerns exchange meetings,  
31 leadership development, educational sessions and outreach visits by the national support team of 113  
32 Suicide Prevention to help the institutions interpreting their feedback reports and to formulate and  
33 execute action plans for improvement.  
34  
35  
36  
37  
38  
39  
40  
41  
42  
43  
44

### 45 **Recruitment of SUPRANET Care participants**

46  
47 Participants were recruited by 113 Suicide Prevention using invitational conferences to inform  
48 candidates about the nature of the SUPRANET program and the possibility (and necessity) of co-  
49 creating this program. Participants can partake within the SUPRANET Care program annually. At this  
50 moment, thirteen Dutch mental health care institutions participate within the network. In order to be  
51 eligible, participants have to provide specialist care involving acute inpatient clinics, residential care,  
52  
53  
54  
55  
56  
57  
58  
59  
60



1  
2  
3 outpatient clinics, crisis resolution/home treatment care, partial hospitalization for adults and elderly  
4 (18 and older). Next to specialist care, most (N = 10) provide general basic behavioral health care  
5 (BGGZ) to patients with mild or non-complex mental health problems. From January to June 2017,  
6  
7 the thirteen Dutch mental health care institutions participating in the SUPRANET program provided  
8  
9 care to more than 300.000 patients.  
10  
11

### 12 13 **Data collection of SUPRANET Care**

14  
15 SUPRANET Care collects data on suicide, suicide attempts and their determinants in a national  
16  
17 registry, as well as consumer care policies and practices to provide meaningful feedback on successful  
18  
19 approaches to prevent suicide in mental health care. Consensus rounds with key professionals  
20  
21 recruited from the participant organizations resulted in the definition of a minimal dataset consisting of  
22  
23 data pertaining to all patients in treatment with respect to gender, age, DSM – IV/V diagnosis, GAF  
24  
25 score, type of care, marital status, safety plan, waiting-list duration, registration of a contact person,  
26  
27 treatment duration, suicides, and suicide attempts. Furthermore, organizational characteristics of  
28  
29 participating institutions are collected including the number of psychiatric beds, total number of  
30  
31 psychiatric admission days and absenteeism of staff. Each SUPRANET participant agreed to deliver  
32  
33 the data on an aggregated level to the SUPRANET Care data-analyst, who combines them in a  
34  
35 national registry. Data is collected every six months.  
36

### 37 **Privacy**

38  
39 To protect the privacy of patients, data managers of participating mental health institutions  
40  
41 aggregate the patient and treatment data. Using aggregated data, neither SUPRANET Care nor the  
42  
43 data-analyst is able to decrypt personal patient information. Aggregated data and the results of  
44  
45 statistical analyses will be reviewed by researchers of SUPRANET Care to ensure the anonymity of  
46  
47 both patients and mental health institutions before publication. The SUPRANET Care data-analyst  
48  
49 works in a secure network environment and uses a central database to pool the data. On request, data  
50  
51 will be made available for other research after approval of the SUPRANET Care board.  
52

### 53 **Evaluation of the feasibility and impact of SUPRANET Care**

1  
2  
3 The purpose of the evaluation is to investigate the activities of SUPRANET Care by examining its  
4 feasibility and impact on suicide and suicide attempts.  
5

6  
7 This study aims to answer:  
8

9  
10 (1) Is SUPRANET Care implemented as intended, in terms of:

11 (a) Is the multifaceted performance feedback provided and used as intended?

12 (b) Does SUPRANET Care facilitate the implementation of key guideline  
13 recommendations?  
14

15 (c) Is it feasible to register reliable, unambiguous data on completed suicide and on  
16 suicide attempts, and on this basis, to generate meaningful feedback?  
17

18  
19  
20 (2) Does the implementation strategy of SUPRANET Care lead to:

21 (a) Reduced suicide rates in time compared to baseline?

22 (b) Increased registration of suicide attempts in time compared to baseline?

23 (c) Improved mutually shared professional knowledge, attitude and adherence to suicide  
24 prevention guidelines in time compared to baseline?  
25

## 26 27 28 29 30 31 32 33 **Materials and methods**

### 34 35 **Design**

36  
37 The outcomes to evaluate the feasibility and impact of SUPRANET Care are studied using an  
38 uncontrolled longitudinal prospective design. To determine whether the SUPRANET Care  
39 implementation approach affects the three outcome variables (standardized suicide mortality,  
40 registration of suicide attempts, and professional knowledge), an implementation study will be  
41 performed using an interrupted time series analysis at three levels. Level one is a process evaluation: Is  
42 the multifaceted feedback performed as intended. Level two is the measurement of the extent of  
43 implementation of the quality indicators. Finally, the third level is the effect over time of the  
44 intervention on the three outcome variables (standardized suicide mortality, registration of suicide  
45 attempts, and professional knowledge).  
46  
47  
48  
49  
50  
51  
52  
53

### 54 55 56 **Evaluation procedure of the feasibility and impact of SUPRANET Care**

1  
2  
3 **1. Is SUPRANET Care implemented as intended, in terms of:**

4 **a. Is the multifaceted performance feedback provided and used as intended?**

5  
6  
7 In order to answer the first research questions, we will evaluate the multifaceted performance  
8 feedback. Annual interview rounds will be held with the local team members and at least three  
9 professionals per institution to determine (1) the extent to which the multifaceted feedback is  
10 performed as intended, (2) whether feedback reports provide meaningful information to professionals,  
11 (3) how feedback reports are used in practice for improvement actions and (4) which best practices  
12 arise. Data derived from the interviews on the process evaluation will be described and will contribute  
13 to the knowledge of successes and barriers of the implementation approach.  
14  
15  
16  
17  
18  
19  
20

21  
22 **b. Does SUPRANET Care facilitate the implementation of key guideline recommendations**  
23 **and better quality of suicide prevention in mental health care?**

24  
25  
26 To answer this research question, we will validate and examine the implementation process of a  
27 core set of relevant and action-oriented quality indicators. In order to do this, standardization of  
28 definitions and terminology is needed. By using a standard terminology and a data dictionary, all  
29 institutions know exactly what is meant and results are comparable and can be used for benchmarking.  
30 To achieve this, first, project leads select quality indicators for suicide prevention in mental health  
31 based on a literature search and the Dutch multidisciplinary guideline. Next, the selected quality  
32 indicators are discussed in a small group of mental health care professionals and suicide experts (the  
33 SUPRANET Care Quality of Care group). This discussion results in a basic set of relevant and action  
34 oriented quality indicators. Finally the Delphi method will be used to further achieve convergence of  
35 opinion among suicide experts, members of clients' advisory boards, experts with experiences in  
36 suicidal behavior and health care professionals to create common definitions and nomenclature.  
37  
38  
39  
40  
41  
42  
43  
44  
45  
46  
47

48 After standardization of language, at least five quality indicators for implementation are jointly  
49 chosen. Criteria for selection of quality indicators are relevance (it affects the number of suicides in  
50 the institution), action orientation (it can be influenced by the mental health institutions or  
51 professionals themselves) and feasibility (it is feasible to implement and monitor). At least 50 experts  
52 in the field of suicide prevention and staff members of each mental health institution will receive an  
53  
54  
55  
56  
57  
58  
59  
60

1  
2  
3 online questionnaire for expert opinion. After the Delphi round, the prioritized indicators and  
4 definitions are proposed to the SUPRANET Care Quality of Care group and the SUPRANET Care  
5 board. After this, the selected quality indicators will be implemented with the feedback procedure as  
6 described above.  
7  
8  
9

10 During the study period, the implementation process on each quality indicator will be  
11 measured and evaluated with the SUPRANET Care database. Prioritized quality indicators (e.g.  
12 safety-plan; waiting-list) will be operationalized and included in the minimal dataset. Results from the  
13 SUPRANET Care database will be used to transfer knowledge among mental health care institutions.  
14  
15  
16  
17

18  
19 **c. Is it feasible to register reliable, unambiguous data on completed suicide and on suicide**  
20 **attempts, and on this basis, to generate meaningful feedback?**  
21  
22

23  
24 To examine the feasibility of registering completed suicide and suicide attempt data, the extent of  
25 registration will be monitored biannually on 5-point rating scale (0 = mental health care institution  
26 does not register suicide (attempts); 5 = mental health care institutions registers all suicide (attempts)  
27 of their patients). In addition, suicide and suicide attempt data will be monitored biannually in the  
28 SUPRANET Care database whereby changes can be investigated. To this end, standardization of  
29 definitions and terminology of suicide and suicide attempt is of great importance. The SUPRANET  
30 Care registration group determines the definitions of suicide (attempt) for adoption by all SUPRANET  
31 Care mental health institutions.  
32  
33  
34  
35  
36  
37  
38  
39

40 **2. Does the implementation strategy of SUPRANET Care lead to suicide safer mental**  
41 **health care institutions in terms of three outcome variables:**  
42  
43

44 **a. Reduced suicide rates in time compared to baseline**  
45  
46

47 Standardized suicide rates will be the primary outcome variable of this study. In order to analyze  
48 the effect of the SUPRANET Care program on reducing suicide rates in mental health care  
49 institutions, all suicide cases will be defined and measured. A recent pilot across four SUPRANET  
50 Care institutions showed the feasibility of extracting these data from existing data-registration systems  
51 and the ability to compute suicide rates adjusted for relevant confounding factors to make comparisons  
52  
53  
54  
55  
56  
57  
58  
59  
60

1  
2  
3 over time plausible.

4  
5 In order to identify differences between institutions and within institutions over time,  
6  
7 standardized suicide rates will be calculated biannually. Differences between and changes in the  
8  
9 number of suicides could be attributed to differences in the patient population of institutions. To  
10  
11 compare mortality data, absolute numbers of suicide have to be adjusted for confounders (e.g.  
12  
13 demographic, psychiatric severity factors) in order to be able to attribute differences in patient suicide  
14  
15 rates to policy, service or staff related factors of the institutions. Therefore, for each SUPRANET Care  
16  
17 institution, suicide rates will be adjusted for confounding factors in the client population of each  
18  
19 institution using indirect standardization. This method is preferred when one or more confounding –  
20  
21 specific mortality rates are based on small numbers<sup>22</sup>. Adjustment for risk factors like gender, age and  
22  
23 DSM-IV/V diagnosis will make comparison within and between institutions more reasonable, and  
24  
25 thereby learning possible.

#### 26 27 **b. Increased registration of suicide attempts in time compared to baseline**

28  
29 The second outcome variable in this study, is the extent to which suicide attempts are being  
30  
31 registered. Currently, suicide attempts are hardly registered in Dutch mental health institutions.  
32  
33 Monitoring and registration of suicide attempts may be one of the quality indicators improving the  
34  
35 quality of care for suicidal patients as a suicide attempt is an important risk factor for completed  
36  
37 suicide<sup>23</sup>. SUPRANET Care will encourage the registration of suicide attempts of patients in care.  
38  
39 Changes in the extent to which suicide attempts of patients are registered, will be analyzed with the  
40  
41 suicide attempt data that are monitored biannually in the national SUPRANET database. We  
42  
43 hypothesize that SUPRANET Care will lead to increased registration of suicide attempts.

#### 44 45 **c. Improved mutually shared knowledge, attitude and adherence to suicide prevention** 46 47 **guidelines in time compared to baseline**

48  
49  
50 The third outcome variable is improved mutually shared professional knowledge, attitude and  
51  
52 adherence to suicide prevention guidelines compared to baseline. In order to measure the outcome, an  
53  
54 extended version of the PITSTOP suicide survey (Professionals In Training to STOP suicide) among  
55  
56 crisis teams and ambulatory care teams in each participating mental health institution will be held to  
57  
58  
59

1  
2  
3 test (1) the shared knowledge of suicidal behavior and suicide prevention, (2) the attitude of healthcare  
4 professionals towards suicidal patients and (3) adherence to the clinical practice guidelines<sup>24</sup>. This  
5 questionnaire will be conducted in crisis teams and ambulatory care teams at baseline (before the  
6 SUPRANET Care implementation approach) with annual repeated measurements after one, two and  
7 three years. An improvement in shared knowledge and attitude of professionals and adherence to  
8 guidelines is expected<sup>24</sup>.  
9  
10  
11  
12  
13

### 14 15 **Statistical analysis**

16  
17 First, the implementation progress will be analyzed. The first data collection is for the purpose of  
18 having the baseline measurement. Outcomes on progress in implementation are assessed biannually at  
19 the organizational, professional, and patient level using data from the national registry of SUPRANET  
20 Care. Generalized Linear Model (GLM) repeated measures will be used to analyze if institutions  
21 change over time on each quality indicator including registration of a contact person, waiting-list  
22 duration and safety-plan.  
23  
24  
25  
26  
27

28  
29 To test the effect of the SUPRANET Care implementation approach on the outcome variables,  
30 Interrupted Time-Series Analysis Procedure (ITSACORR) will be conducted, designed to analyse  
31 short time series that likely have auto correlated errors<sup>25</sup>. ITSACORR is the preferred method above  
32 Autoregressive Integrated Moving Average (ARIMA) in relatively short time-series data<sup>26</sup>. The result  
33 is a “repeated time series” that, unlike pre- and post-intervention means or percentage difference tests,  
34 enables investigation of the pattern of change over time and include its mean level (the average of all  
35 time points) and changes in its slope<sup>25</sup>. To strengthen this uncontrolled study design, health care  
36 organizations’ level of implementation is added to the study. If organizations with better, or greater  
37 number of, implemented quality indicators show greater change in the outcomes, it strengthens the  
38 argument that the SUPRANET Care approach led to the changes.  
39  
40  
41  
42  
43  
44  
45  
46  
47  
48

### 49 **Patient and public involvement**

50  
51 A member of the clients’ advisory board participates in the board of the SUPRANET Care  
52 Foundation. Experts with experiences in suicidal behavior are involved in the development of  
53 SUPRANET GGZ: in the Delphi study to create useful quality indicators for implementation.  
54  
55  
56  
57  
58  
59  
60

1  
2  
3 Furthermore, they actively participate in the workgroups: the Quality of Care Group and the  
4 Registration Group, in which professionals recruited from the participant organizations participate.  
5  
6 Results of the study will be disseminated to the study participants, through feedback reports,  
7  
8 presentations and messages on our website ([www.supranetggz.nl](http://www.supranetggz.nl)).  
9

## 10 11 **Discussion**

12  
13 This paper describes the study protocol of a longitudinal study investigating the activities of  
14 SUPRANET Care by examining its feasibility and impact in a network formed by thirteen specialist  
15 mental health care institutions. It will be the first study worldwide to report on the results of a  
16 confidential learning network approach in suicide prevention. We expect that SUPRANET Care will  
17 improve shared knowledge of professionals, increase the registration of suicide attempts and decrease  
18 suicide rates in Dutch mental health care.  
19  
20  
21  
22  
23

24  
25 Suicide is the worst outcome of mental illness. Recent evidence shows that suicide prevention  
26 in mental health care can be enhanced considerably by creating a culture that puts patient and staff  
27 safety first; and by systematically improving the quality and organization of care<sup>89</sup>. This involves the  
28 implementation of guideline best practices addressing contextual barriers and facilitators at different  
29 levels; continually addressing targeted quality and safety issues using plan-do-check-act cycles. Given  
30 the low base rate of suicides and suicide attempts, large and longitudinal databases are needed to  
31 assess the impact of quality improvement and guideline best practice implementation. The  
32 SUPRANET Care program contains these elements and may prove to be a successful new approach to  
33 enhance suicide prevention in mental health care.  
34  
35  
36  
37  
38  
39  
40  
41  
42

43  
44 Strength of the study is that SUPRANET Care is a bottom-up initiative covering almost half of  
45 the large mental health care organizations in the Netherlands, with a clear ambition to work together to  
46 improve guideline implementation, suicide prevention and quality of care in Dutch mental health  
47 settings. Also, experts with experiences in suicidal behavior are involved in the organization of  
48 SUPRANET Care.  
49  
50  
51

52  
53 A limitation of our study is the aggregation of the collected patient and treatment data to  
54 protect the privacy of patients and SUPRANET Care nor the data-analyst is thus able to decrypt  
55 personal patient information to follow patients in time. However, for feedback reports and our  
56  
57  
58  
59  
60

1  
2  
3 implementation and study goals, the aggregated data appear sufficient.

4 SUPRANET Care is a unique project worldwide. When successful, all Dutch mental health  
5 settings will be invited to join SUPRANET and to include the quality indicators into their policy for  
6 suicide prevention. As the results will be of high relevance for countries in and outside of Europe, the  
7 implementation approach of SUPRANET Care, and the gained knowledge of the evaluation study will  
8 be shared with an international audience.  
9  
10  
11  
12  
13

14  
15 **Ethics and dissemination:** This study protocol has been approved by the Central Committee on  
16 Research Involving Human Subjects, the Netherlands. This study does not fall under the scope of the  
17 Medical Research Involving Human Subjects Act (WMO).  
18  
19

20  
21 **Acknowledgments:** The authors would like to thank all thirteen specialist mental health institutions  
22 for their efforts and participation in the SUPRANET Care network. Thanks to the suicide experts,  
23 SUPRANET board, members of the clients' advisory board, the work- and project groups for their  
24 involvement in the organization of SUPRANET Care.  
25  
26  
27  
28

29  
30 **Author Contributions:** All authors contributed to the design of the study. KS drafted the manuscript.  
31 JK, AB, GF, IV, DD, ME and RG made critical revisions to and edited the manuscript. All authors  
32 contributed to and approved the final manuscript..  
33  
34  
35

36  
37 **Competing interests statement:** The authors declare no competing interests to disclose.

38  
39 **Funding statement:**

40 This study is funded by the Ministry of Health Funding-program for Health Care Efficiency Research  
41 ZonMw (537001006). ZonMw is not involved in the design of the study and does not participate in the  
42 data collection, analysis of the data and writing of the manuscript.  
43  
44  
45  
46  
47

48  
49 **References**

- 50 1. O'Connor RC, Nock MK. The psychology of suicidal behaviour. *Lancet Psychiatry*  
51 2014;1(1):73-85. doi: 10.1016/S2215-0366(14)70222-6  
52 2. Hoertel N, Le Strat Y, Lavaud P, et al. Generalizability of clinical trial results for bipolar  
53 disorder to community samples: findings from the National Epidemiologic Survey on  
54 Alcohol and Related Conditions. *J Clin Psychiatry* 2013;74(3):265-70. doi:  
55 10.4088/JCP.12m07935  
56  
57  
58  
59  
60



3. Lönnqvist J. Major psychiatric disorders in suicide and suicide attempters. *Oxford textbook of suicidology and suicide prevention: A global perspective* 2009:275-86.
4. Forkmann T, Brahler E, Gauggel S, et al. Prevalence of suicidal ideation and related risk factors in the German general population. *J Nerv Ment Dis* 2012;200(5):401-5. doi: 10.1097/NMD.0b013e31825322cf
5. Rihmer Z. Suicide risk in mood disorders. *Curr Opin Psychiatry* 2007;20(1):17-22. doi: 10.1097/YCO.0b013e3280106868
6. Organization WH. Preventing suicide: a global imperative. [www.who.int/mental\\_health/suicide-prevention/world\\_report\\_2014/en/](http://www.who.int/mental_health/suicide-prevention/world_report_2014/en/) (14) Accessed March 17.
7. Huisman A, Robben PB, Kerkhof AJ. An examination of the Dutch Health Care Inspectorate's supervision system for suicides of mental health care users. *Psychiatr Serv* 2009;60(1):80-5. doi: 10.1176/appi.ps.60.1.80  
10.1176/ps.2009.60.1.80 [published Online First: 2008/12/31]
8. While D, Bickley H, Roscoe A, et al. Implementation of mental health service recommendations in England and Wales and suicide rates, 1997-2006: a cross-sectional and before-and-after observational study. *Lancet* 2012;379(9820):1005-12. doi: 10.1016/S0140-6736(11)61712-1
9. Kapur N, Ibrahim S, While D, et al. Mental health service changes, organisational factors, and patient suicide in England in 1997–2012: a before-and-after study. *The Lancet Psychiatry* 2016;3(6):526-34.
10. van Hemert A, Kerkhof A, de Keijser B, et al. Multidisciplinaire richtlijn Diagnostiek en Behandeling van Suicidaal Gedrag [Multidisciplinary guideline Diagnostics and Treatment of Suicidal Behavior]. *Utrecht: De Tijdstroom* 2012
11. Mokkenstorm J. Results of a monitor based dialogue approach to support the implementation of suicide prevention according to guidelines in specialist mental health care in the Netherlands. Manuscript in preparation. . 2017
12. de Beurs DP, de Groot MH, de Keijser J, et al. Evaluation of benefit to patients of training mental health professionals in suicide guidelines: cluster randomised trial. *Br J Psychiatry* 2016;208(5):477-83. doi: 10.1192/bjp.bp.114.156208
13. Cochrane LJ, Olson CA, Murray S, et al. Gaps between knowing and doing: understanding and assessing the barriers to optimal health care. *J Contin Educ Health Prof* 2007;27(2):94-102. doi: 10.1002/chp.106
14. Grol R, Grimshaw J. From best evidence to best practice: effective implementation of change in patients' care. *Lancet* 2003;362(9391):1225-30. doi: 10.1016/S0140-6736(03)14546-1
15. Healthcare Inspectorate I. Overzicht van het aantal suïcides en suïcidepogingen met ernstig letsel tot gevolg binnen de ggz-instellingen. [https://www.igz.nl/onderwerpen/publieke-en-geestelijke-gezondheidszorg/geestelijke\\_gezondheidszorg/cijfers\\_over\\_suicides\\_ggz/](https://www.igz.nl/onderwerpen/publieke-en-geestelijke-gezondheidszorg/geestelijke_gezondheidszorg/cijfers_over_suicides_ggz/) (2017). Accessed Feb 2017. . 2017
16. Hawton K, Pirkis J. Suicide is a complex problem that requires a range of prevention initiatives and methods of evaluation. *Br J Psychiatry* 2017;210(6):381-83. doi: 10.1192/bjp.bp.116.197459 [published Online First: 2017/06/03]
17. Mokkenstorm J, Franx G, Gilissen R, et al. Suicide Prevention Guideline Implementation in Specialist Mental Healthcare Institutions in The Netherlands. *Int J Environ Res Public Health* 2018;15(5) doi: 10.3390/ijerph15050910 [published Online First: 2018/05/13]
18. van de Klundert N, Holman R, Dongelmans DA, et al. Data Resource Profile: the Dutch National Intensive Care Evaluation (NICE) Registry of Admissions to Adult Intensive Care Units. *Int J Epidemiol* 2015;44(6):1850-50h. doi: 10.1093/ije/dyv291
19. de Keizer N, de Jonge E. National IC Evaluation (NICE): a Dutch quality control system. *J ICU management* 2005;3:62-64.

- 1  
2  
3 20. Van Leersum NJ, Snijders HS, Henneman D, et al. The Dutch surgical colorectal audit.  
4 *Eur J Surg Oncol* 2013;39(10):1063-70. doi: 10.1016/j.ejso.2013.05.008  
5 21. van Dijk MK, Oosterbaan DB, Verbraak MJ, et al. Effectiveness of the implementation of  
6 guidelines for anxiety disorders in specialized mental health care. *Acta Psychiatr*  
7 *Scand* 2015;132(1):69-80. doi: 10.1111/acps.12338  
8 22. Israëls A. Standaardisatiemethoden. . *Centraal Bureau voor de Statistiek: Den*  
9 *Haag/Heerlen* 2010  
10 23. Hawton K, Casanas ICC, Haw C, et al. Risk factors for suicide in individuals with  
11 depression: a systematic review. *J Affect Disord* 2013;147(1-3):17-28. doi:  
12 10.1016/j.jad.2013.01.004 [published Online First: 2013/02/16]  
13 24. de Beurs DP, de Groot MH, de Keijser J, et al. The effect of an e-learning supported  
14 Train-the-Trainer programme on implementation of suicide guidelines in mental health  
15 care. *J Affect Disord* 2015;175:446-53. doi: 10.1016/j.jad.2015.01.046  
16 25. Biglan A, Ary D, Wagenaar AC. The value of interrupted time-series experiments for  
17 community intervention research. *Prev Sci* 2000;1(1):31-49.  
18 26. Crosbie J. Interrupted time-series analysis with brief single-subject data. *J Consult Clin*  
19 *Psychol* 1993;61(6):966-74.  
20  
21  
22  
23  
24  
25  
26  
27  
28  
29  
30  
31  
32  
33  
34  
35  
36  
37  
38  
39  
40  
41  
42  
43  
44  
45  
46  
47  
48  
49  
50  
51  
52  
53  
54  
55  
56  
57  
58  
59  
60

# BMJ Open

## Feasibility and impact of data-driven learning within the suicide prevention action network of thirteen specialist mental healthcare institutions (SUPRANET Care) in the Netherlands: A study protocol

|                                 |                                                                                                                                                                                                                                                                                                                                                                                                                                                                                                                                                                                                                                                                                                                                                                                                       |
|---------------------------------|-------------------------------------------------------------------------------------------------------------------------------------------------------------------------------------------------------------------------------------------------------------------------------------------------------------------------------------------------------------------------------------------------------------------------------------------------------------------------------------------------------------------------------------------------------------------------------------------------------------------------------------------------------------------------------------------------------------------------------------------------------------------------------------------------------|
| Journal:                        | <i>BMJ Open</i>                                                                                                                                                                                                                                                                                                                                                                                                                                                                                                                                                                                                                                                                                                                                                                                       |
| Manuscript ID                   | bmjopen-2018-024398.R1                                                                                                                                                                                                                                                                                                                                                                                                                                                                                                                                                                                                                                                                                                                                                                                |
| Article Type:                   | Protocol                                                                                                                                                                                                                                                                                                                                                                                                                                                                                                                                                                                                                                                                                                                                                                                              |
| Date Submitted by the Author:   | 26-Jun-2018                                                                                                                                                                                                                                                                                                                                                                                                                                                                                                                                                                                                                                                                                                                                                                                           |
| Complete List of Authors:       | Setkowski, Kim; 113 Suicide Prevention<br>Mokkenstorm, Jan; 113 Suicide Prevention; Amsterdam Public Health research institute, VU University Medical Center and GGZinGeest, Department of Psychiatry<br>van Balkom, Anton; Amsterdam Public Health research institute, VU University Medical Center and GGZinGeest, Department of Psychiatry<br>Franx, Gerdien ; 113 Suicide Prevention<br>Verbeek- van Noord, Inge; 113 Suicide Prevention<br>Dongelmans, Dave; Academic Medical Center, University of Amsterdam, Department of Intensive Care Medicine; National Intensive Care Evaluation (NICE) foundation<br>Eikelenboom, Merijn; Amsterdam Public Health research institute, VU University Medical Center and GGZinGeest, Department of Psychiatry<br>Gilissen, Renske; 113 Suicide Prevention |
| <b>Primary Subject Heading</b>: | Mental health                                                                                                                                                                                                                                                                                                                                                                                                                                                                                                                                                                                                                                                                                                                                                                                         |
| Secondary Subject Heading:      | Mental health, Health services research                                                                                                                                                                                                                                                                                                                                                                                                                                                                                                                                                                                                                                                                                                                                                               |
| Keywords:                       | suicide, suicide attempt, implementation study, guideline, quality of care, mental health care                                                                                                                                                                                                                                                                                                                                                                                                                                                                                                                                                                                                                                                                                                        |
|                                 |                                                                                                                                                                                                                                                                                                                                                                                                                                                                                                                                                                                                                                                                                                                                                                                                       |

SCHOLARONE™  
Manuscripts

1  
2  
3 1 **Feasibility and impact of data-driven learning within the suicide prevention action network of**  
4 **thirteen specialist mental healthcare institutions (SUPRANET Care) in the Netherlands: A study**  
5 **protocol**  
6  
7

8  
9 4 **Authors:** Kim Setkowski <sup>1,\*</sup>, Jan Mokkenstorm <sup>1,2</sup>, Anton J.L.M. van Balkom <sup>2</sup>, Gerdien Franx <sup>1</sup>,  
10  
11 5 Inge Verbeek- van Noord <sup>1</sup>, Dave. A. Dongelmans <sup>3,4</sup>, Merijn Eikelenboom <sup>2</sup> and Renske Gilissen <sup>1</sup>  
12  
13  
14 6

15 7 <sup>1</sup> 113 Suicide Prevention, Amsterdam, The Netherlands; j.mokkenstorm@113.nl (J.M.);  
16  
17 8 g.franx@113.nl (G.F.); i.verbeek@113.nl (I.V.); r.gilissen@113.nl (R.G.)  
18

19 9 <sup>2</sup> Department of Psychiatry, Amsterdam Public Health research institute, VU University Medical  
20  
21 10 Center and GGZinGeest, Amsterdam, The Netherlands; t.balkom@ggzingeest.nl (T.v.B.);  
22  
23 11 m.eikelenboom@ggzingeest.nl (M.E.)  
24

25 12 <sup>3</sup> Department of Intensive Care Medicine, Academic Medical Center, University of Amsterdam, The  
26  
27 13 Netherlands; d.a.dongelmans@amc.uva.nl (D.D.)  
28

29 14 <sup>4</sup> National Intensive Care Evaluation (NICE) foundation, Amsterdam, The Netherlands  
30  
31 15

32  
33 16 \* Correspondence: k.setkowski@113.nl  
34

35 17 **Abstract**  
36  
37

38 18 **Introduction:** Improvement of the quality and safety of care is associated with lower suicide rates  
39  
40 19 among mental health care patients. In the Netherlands about 40% of all people that die by suicide is in  
41  
42 20 specialist mental health care. Unfortunately, the degree of implementation of suicide prevention  
43  
44 21 policies and best practices within Dutch mental health care services is variable. Sharing and comparing  
45  
46 22 outcome and performance data in confidential networks of professionals working in different  
47  
48 23 organizations can be effective in reducing practice variability within and across organizations and  
49  
50 24 improving quality of care.  
51

52 25 **Methods and Analysis:** Using formats of professional networks to improve surgical care (DICA) and  
53  
54 26 somatic intensive care (NICE), 113 Suicide Prevention has taken the lead in the formation of a Suicide  
55  
56 27 Prevention Action Network (SUPRANET Care), with at present thirteen large Dutch specialist mental  
57  
58  
59

1  
2  
3 28 health institutions. Data on suicide, suicide attempts and their determinants as well as consumer care  
4  
5 29 policies and practices is collected biannually, after consensus rounds in which key professionals define  
6  
7 30 what data is relevant to collect, how it is operationalized, retrieved and will be analyzed. To evaluate  
8  
9 31 the impact of SUPRANET Care, standardized suicide rates will be calculated adjusted for confounding  
10  
11 32 factors. Second, the extent to which suicide attempts are being registered will be analyzed with the  
12  
13 33 suicide attempt data. Finally, professionals' knowledge, attitude and adherence to suicide prevention  
14  
15 34 guidelines will be measured with an extended version of the Professionals In Training to STOP suicide  
16  
17 35 survey.

18  
19 36 **Ethics and dissemination:** This study has been approved by the Central Committee on Research  
20  
21 37 Involving Human Subjects, the Netherlands. This study does not fall under the scope of the Medical  
22  
23 38 Research Involving Human Subjects Act (WMO) or the General Data Protection Regulation (GDPR)  
24  
25 39 as stated by the Dutch Data Protection Authority (Dutch DPA), because data is collected on an  
26  
27 40 aggregated level.

28  
29  
30  
31 42 **Strengths and limitations of this study:**

- 32  
33 43 ○ Sharing of data which are jointly chosen, operationalized, defined, and registered.  
34  
35 44 ○ Analyses of standardized suicide rates, allowing for benchmark comparisons between and  
36  
37 45 within organizations; and for monitoring changes in service provision.  
38  
39 46 ○ Biannual feedback to the institutions using feedback reports, along with guided improvement  
40  
41 47 makes that mental health organizations and practitioners can immediately use the results in  
42  
43 48 their practice.  
44  
45 49 ○ Due to the aggregation of the collected patient and treatment data to protect the privacy of  
46  
47 50 patients, it is not possible to decrypt personal patient information to follow patients in time.

48  
49 51 **Keywords:** suicide; suicide attempt; implementation study; guideline; quality of care; mental  
50  
51 52 health care

52  
53  
54 53  
55 54 **Introduction**

1  
2  
3 55 Mental health problems are important risk factors for suicide and suicidal behavior<sup>1-3</sup>. Many  
4  
5 56 patients with psychiatric disorders, like mood-, anxiety-, and personality disorders also suffer from  
6  
7 57 suicidal ideation that may lead to self-harming behaviors or to suicide<sup>4,5</sup>. This makes suicide  
8  
9 58 prevention a core component and responsibility of health care services, in particular of those working  
10  
11 59 in the field of behavioral and specialist mental health<sup>6</sup>. In the Netherlands about 40% of all people that  
12  
13 60 die by suicide is in specialist mental health care<sup>7</sup>.

14  
15 61 The implementation of guideline best practices appears to be of paramount importance in  
16  
17 62 preventing suicide among patients in health care. A recent large-scale UK study showed that the  
18  
19 63 implementation of service guideline recommendations significantly reduced the suicide rate with more  
20  
21 64 than two suicides per 10.000 patient contacts<sup>8</sup>. Kapur et al<sup>9</sup> demonstrated a 20-30% reduction of  
22  
23 65 suicide rates in mental health services in England associated with sixteen specific service  
24  
25 66 improvements and implementation of guideline recommendations. In 2012, the Dutch  
26  
27 67 multidisciplinary guideline for the diagnosis and treatment of suicidal behavior was published<sup>10</sup>, but  
28  
29 68 its uptake by the field is problematic with marked degrees of variation of suicide prevention policies  
30  
31 69 and practices in mental health care institutions across the country<sup>11</sup>. To promote its implementation a  
32  
33 70 one-day training program was developed and tested with significant positive effects on professionals'  
34  
35 71 competences and attitude towards guideline best practices<sup>12</sup>. To date, the majority of specialist mental  
36  
37 72 health workers have not partaken in this training. These observations illustrate that guideline  
38  
39 73 implementation and quality improvement can be difficult<sup>13,14</sup>.

40  
41 74 Although suicide is a relatively common cause of death in the high-risk population of patients  
42  
43 75 in specialist mental health<sup>7,15</sup>, its population base rate is too low to assess the preventative impact of  
44  
45 76 specific practices or routines within a single health care organization. Suicide attempts that have a  
46  
47 77 much higher incidence rate are considered a valuable proxy outcome measure to evaluate the  
48  
49 78 effectiveness of prevention and intervention<sup>16</sup>. Unfortunately, most mental health organizations in the  
50  
51 79 Netherlands do not systematically register and analyze suicide attempts in their patient populations. To  
52  
53 80 date, annual suicide numbers are collected on institutional and national levels for reporting purposes  
54  
55 81 only<sup>15</sup>. Due to confounders and lack of standardized registration, these absolute numbers are not  
56  
57 82 useful to drive learning and improvement. As a result, it is unclear to what extent the (lack of)

1  
2  
3 83 implementation of guideline recommendations affect suicide and suicide attempt rates among patients  
4  
5 84 in Dutch specialist mental health care.

6  
7 85 Given growing concerns and waning acceptance of suicide as an outcome of mental health  
8  
9 86 treatment among health care professionals and in Dutch society, guideline implementation has become  
10  
11 87 a focal point of the national suicide prevention strategy <sup>17</sup>. Commissioned by the Ministry of Welfare,  
12  
13 88 Health and Sports, 113 Suicide Prevention change agents monitored the degree of implementation of  
14  
15 89 guideline-based policies in the largest 25 Dutch specialist mental health care organizations <sup>11</sup>. This  
16  
17 90 resulted in growing awareness of their responsibility and potential to enhance suicide prevention  
18  
19 91 efforts. Bringing together leaders and key health care professionals within interested specialist mental  
20  
21 92 health organizations, 113 proposed to form a Suicide Prevention Action Network in health care  
22  
23 93 (SUPRANET Care). The SUPRANET Care program is modeled after successful examples in Dutch  
24  
25 94 somatic health care: the Netherlands Intensive Care Evaluation (NICE) project and the Dutch Initiative  
26  
27 95 for Clinical Auditing (DICA) network that showed improved quality of care as a result of benchmark  
28  
29 96 feedback based on joint registration of standardized process- and outcome data. Within the NICE  
30  
31 97 network <sup>18</sup>, more than 90 participant Intensive Care Units of general hospitals across the Netherlands  
32  
33 98 share, evaluate and use registered data to improve the quality of care <sup>19</sup>. The DICA was founded with  
34  
35 99 the objective to organize and support clinical audits by facilitating on legal, technical, methodological  
36  
37 100 and logistic issues <sup>20</sup>. This has led to improved quality of care with reduced practice variance in the  
38  
39 101 field of colorectal, pancreatic and cardiovascular surgery. Also, SUPRANET Care takes example after  
40  
41 102 the successful implementation of treatment guidelines for anxiety disorders in the Netherlands. Van  
42  
43 103 Dijk et al showed that a multilevel, multifaceted and systematical implementation strategy resulted in  
44  
45 104 higher quality of care leading to earlier patient recovery compared to a treatment setting in which  
46  
47 105 guidelines were passively disseminated <sup>21</sup>.

48  
49 106 SUPRANET Care aims at improving quality and safety of care to enhance suicide prevention  
50  
51 107 by: 1) collecting standardized process, practice and suicide (attempt) outcome data, 2) providing  
52  
53 108 benchmark feedback reports to participant organizations, 3) identifying trends and promising  
54  
55 109 preventative practices, and 4) systematically implement these practices across the network. After due  
56  
57 110 settlement of legal and logistic issues specifically pertaining to privacy and safety of the sharing of



1  
2  
3 111 data, the SUPRANET Care Foundation was founded. The program's first data collection took place in  
4  
5 112 2017. This paper describes the activities of SUPRANET Care and the evaluation of its feasibility and  
6  
7 113 impact.

#### 9 114 **Suicide prevention action network (SUPRANET Care)**

10  
11 115 SUPRANET Care is the confidential learning network of at present thirteen specialist mental  
12  
13 116 health institutions in the Netherlands that share the ambition to optimize suicide prevention. Legally it  
14  
15 117 is a non-profit foundation governed by a board that includes four senior psychiatrists (working as chief  
16  
17 118 medical officers in participating organizations); a patient and family advocate; and two PhD level  
18  
19 119 quality improvement / implementation researchers and experts (the SUPRANET Care project leader  
20  
21 120 and the chairman of the National Intensive Care Evaluation). Each participant organization has signed  
22  
23 121 a contract pertaining to the confidential exchange and analysis of the data and pays an annual 10,000  
24  
25 122 euro participation fee to the SUPRANET Care foundation. The board of the SUPRANET Care  
26  
27 123 Foundation established two workgroups, the Quality of Care Group and the Registration Group, in  
28  
29 124 which professionals recruited from the participant organizations participate. The first group is  
30  
31 125 consulted on the quality of care indicators relevant and feasible to use in daily practice. The second  
32  
33 126 group determines what data are relevant and feasible to collect, and how the data variables are  
34  
35 127 operationalized and retrieved.

#### 37 128 **Multifaceted improvement program**

38  
39 129 A multifaceted benchmark and quality improvement program is offered to each participant  
40  
41 130 containing the following three elements: (1) Biannual feedback reports with benchmark information  
42  
43 131 based on data collected from all participating organizations. The feedback reports are generated by an  
44  
45 132 analysis and support team of 113 Suicide Prevention and sent to and discussed with local suicide  
46  
47 133 prevention teams within the organizations. (2) Improvement modules supported and initiated by the  
48  
49 134 SUPRANET Care board. The aim is to develop strong multidisciplinary teams that continuously  
50  
51 135 promote and monitor suicide prevention activities within the organizations. Ultimate goal is to create  
52  
53 136 useful quality indicators that guide these teams. The third element (3) concerns exchange meetings,  
54  
55 137 leadership development, educational sessions and outreach visits by the national support team of 113



1  
2  
3 138 Suicide Prevention to help the institutions interpreting their feedback reports and to formulate and  
4  
5 139 execute action plans for improvement.  
6

#### 7 140 **Recruitment of SUPRANET Care participants**

8  
9 141 Participants were recruited by 113 Suicide Prevention using invitational conferences to inform  
10  
11 142 candidates about the nature of the SUPRANET program and the possibility (and necessity) of co-  
12  
13 143 creating this program. Participants can partake within the SUPRANET Care program annually. At this  
14  
15 144 moment, thirteen Dutch mental health care institutions participate within the network. In order to be  
16  
17 145 eligible, participants have to provide specialist care involving acute inpatient clinics, residential care,  
18  
19 146 outpatient clinics, crisis resolution/home treatment care, partial hospitalization for adults and elderly  
20  
21 147 (18 and older). Next to specialist care, most (N = 10) provide general basic behavioral health care  
22  
23 148 (BGGZ) to patients with mild or non-complex mental health problems. From January to June 2017,  
24  
25 149 the thirteen Dutch mental health care institutions participating in the SUPRANET program provided  
26  
27 150 care to more than 300.000 patients.  
28

#### 29 151 **Data collection of SUPRANET Care**

30  
31 152 SUPRANET Care collects data on suicide, suicide attempts and their determinants in a national  
32  
33 153 registry, as well as consumer care policies and practices to provide meaningful feedback on successful  
34  
35 154 approaches to prevent suicide in mental health care. Consensus rounds with key professionals  
36  
37 155 recruited from the participant organizations resulted in the definition of a minimal dataset consisting of  
38  
39 156 data pertaining to all patients in treatment with respect to gender, age, DSM – IV/V diagnosis, GAF  
40  
41 157 score, type of care, marital status, safety plan, waiting-list duration, registration of a contact person,  
42  
43 158 treatment duration, suicides, and suicide attempts. Furthermore, organizational characteristics of  
44  
45 159 participating institutions are collected including the number of psychiatric beds, total number of  
46  
47 160 psychiatric admission days and absenteeism of staff. Each SUPRANET participant agreed to deliver  
48  
49 161 the data on an aggregated level to the SUPRANET Care data-analyst, who combines them in a  
50  
51 162 national registry. Data is collected every six months.  
52

#### 53 163 **Privacy**

54  
55  
56  
57  
58  
59  
60

1  
2  
3 164 To protect the privacy of patients, data managers of participating mental health institutions  
4  
5 165 aggregate the patient and treatment data. Using aggregated data, neither SUPRANET Care nor the  
6  
7 166 data-analyst is able to decrypt personal patient information. Hereby it does not fall within the scope of  
8  
9 167 the General Data Protection Regulation (GDPR). Aggregated data and the results of statistical analyses  
10  
11 168 will be reviewed by researchers of SUPRANET Care to ensure the anonymity of both patients and  
12  
13 169 mental health institutions before publication. The SUPRANET Care data-analyst works in a secure  
14  
15 170 network environment and uses a central database to pool the data. On request, data will be made  
16  
17 171 available for other research after approval of the SUPRANET Care board.

## 19 172 **Evaluation of the feasibility and impact of SUPRANET Care**

20  
21 173 The purpose of the evaluation is to investigate the activities of SUPRANET Care by examining its  
22  
23 174 feasibility and impact on suicide and suicide attempts.

24  
25 175 This study aims to answer:

26  
27  
28 176 (1) Is SUPRANET Care implemented as intended, in terms of:

29  
30 177 (a) Is the multifaceted performance feedback provided and used as intended?

31  
32 178 (b) Does SUPRANET Care facilitate the implementation of key guideline  
33  
34 179 recommendations?

35  
36 180 (c) Is it feasible to register reliable, unambiguous data on completed suicide and on  
37  
38 181 suicide attempts, and on this basis, to generate meaningful feedback?

39  
40  
41 182 (2) Does the implementation strategy of SUPRANET Care lead to:

42  
43 183 (a) Reduced suicide rates in time compared to baseline?

44  
45 184 (b) Increased registration of suicide attempts in time compared to baseline?

46  
47 185 (c) Improved mutually shared professional knowledge, attitude and adherence to suicide  
48  
49 186 prevention guidelines in time compared to baseline?

## 51 187 **Materials and methods**

### 52 188 **Design**

1  
2  
3 189 The outcomes to evaluate the feasibility and impact of SUPRANET Care are studied using an  
4  
5 190 uncontrolled longitudinal prospective design. To determine whether the SUPRANET Care  
6  
7 191 implementation approach affects the three outcome variables (standardized suicide mortality,  
8  
9 192 registration of suicide attempts, and professional knowledge), an implementation study will be  
10  
11 193 performed using an interrupted time series analysis at three levels. Level one is a process evaluation: Is  
12  
13 194 the multifaceted feedback performed as intended. Level two is the measurement of the extent of  
14  
15 195 implementation of the quality indicators. Finally, the third level is the effect over time of the  
16  
17 196 intervention on the three outcome variables (standardized suicide mortality, registration of suicide  
18  
19 197 attempts, and professional knowledge).

### 198 **Evaluation procedure of the feasibility and impact of SUPRANET Care**

#### 199 **1. Is SUPRANET Care implemented as intended, in terms of:**

##### 200 **a. Is the multifaceted performance feedback provided and used as intended?**

201 In order to answer the first research questions, we will evaluate the multifaceted performance  
202 feedback. Annual interview rounds will be held with the local team members and at least three  
203 professionals per institution to determine (1) the extent to which the multifaceted feedback is  
204 performed as intended, (2) whether feedback reports provide meaningful information to professionals,  
205 (3) how feedback reports are used in practice for improvement actions and (4) which best practices  
206 arise. Data derived from the interviews on the process evaluation will be described and will contribute  
207 to the knowledge of successes and barriers of the implementation approach.

##### 208 **b. Does SUPRANET Care facilitate the implementation of key guideline recommendations 209 and better quality of suicide prevention in mental health care?**

210 To answer this research question, we will validate and examine the implementation process of a  
211 core set of relevant and action-oriented quality indicators. In order to do this, standardization of  
212 definitions and terminology is needed. By using a standard terminology and a data dictionary, all  
213 institutions know exactly what is meant and results are comparable and can be used for benchmarking.  
214 To achieve this, first, project leads select quality indicators for suicide prevention in mental health

1  
2  
3 215 based on a literature search and the Dutch multidisciplinary guideline. Next, the selected quality  
4  
5 216 indicators are discussed in a small group of mental health care professionals and suicide experts (the  
6  
7 217 SUPRANET Care Quality of Care group). This discussion results in a basic set of relevant and action  
8  
9 218 oriented quality indicators. Finally the Delphi method will be used to further achieve convergence of  
10  
11 219 opinion among suicide experts, members of clients' advisory boards, experts with experiences in  
12  
13 220 suicidal behavior and health care professionals to create common definitions and nomenclature.

14  
15 221 After standardization of language, at least five quality indicators for implementation are jointly  
16  
17 222 chosen. Criteria for selection of quality indicators are relevance (it affects the number of suicides in  
18  
19 223 the institution), action orientation (it can be influenced by the mental health institutions or  
20  
21 224 professionals themselves) and feasibility (it is feasible to implement and monitor). At least 50 experts  
22  
23 225 in the field of suicide prevention and staff members of each mental health institution will receive an  
24  
25 226 online questionnaire for expert opinion. After the Delphi round, the prioritized indicators and  
26  
27 227 definitions are proposed to the SUPRANET Care Quality of Care group and the SUPRANET Care  
28  
29 228 board. After this, the selected quality indicators will be implemented with the feedback procedure as  
30  
31 229 described above.

32  
33 230 During the study period, the implementation process on each quality indicator will be  
34  
35 231 measured and evaluated with the SUPRANET Care database. Prioritized quality indicators (e.g.  
36  
37 232 safety-plan; waiting-list) will be operationalized and included in the minimal dataset. Results from the  
38  
39 233 SUPRANET Care database will be used to transfer knowledge among mental health care institutions.

40  
41 234 **c. Is it feasible to register reliable, unambiguous data on completed suicide and on suicide**  
42  
43 235 **attempts, and on this basis, to generate meaningful feedback?**

44  
45 236 To examine the feasibility of registering completed suicide and suicide attempt data, the extent of  
46  
47 237 registration will be monitored biannually on 5-point rating scale (0 = mental health care institution  
48  
49 238 does not register suicide (attempts); 5 = mental health care institutions registers all suicide (attempts)  
50  
51 239 of their patients). In addition, suicide and suicide attempt data will be monitored biannually in the  
52  
53 240 SUPRANET Care database whereby changes can be investigated. To this end, standardization of  
54  
55 241 definitions and terminology of suicide and suicide attempt is of great importance. The SUPRANET

1  
2  
3 242 Care registration group determines the definitions of suicide (attempt) for adoption by all SUPRANET  
4  
5 243 Care mental health institutions.

6  
7 244 **2. Does the implementation strategy of SUPRANET Care lead to suicide safer mental**  
8  
9 245 **health care institutions in terms of three outcome variables:**

10  
11 246 **a. Reduced suicide rates in time compared to baseline**

12  
13  
14 247 Standardized suicide rates will be the primary outcome variable of this study. In order to analyze  
15  
16 248 the effect of the SUPRANET Care program on reducing suicide rates in mental health care  
17  
18 249 institutions, all suicide cases will be defined and measured. A recent pilot across four SUPRANET  
19  
20 250 Care institutions showed the feasibility of extracting these data from existing data-registration systems  
21  
22 251 and the ability to compute suicide rates adjusted for relevant confounding factors to make comparisons  
23  
24 252 over time plausible.

25  
26 253 In order to identify differences between institutions and within institutions over time,  
27  
28 254 standardized suicide rates will be calculated biannually. Differences between and changes in the  
29  
30 255 number of suicides could be attributed to differences in the patient population of institutions. To  
31  
32 256 compare mortality data, absolute numbers of suicide have to be adjusted for confounders (e.g.  
33  
34 257 demographic, psychiatric severity factors) in order to be able to attribute differences in patient suicide  
35  
36 258 rates to policy, service or staff related factors of the institutions. Therefore, for each SUPRANET Care  
37  
38 259 institution, suicide rates will be adjusted for confounding factors in the client population of each  
39  
40 260 institution using indirect standardization. This method is preferred when one or more confounding –  
41  
42 261 specific mortality rates are based on small numbers<sup>22</sup>. Adjustment for risk factors like gender, age and  
43  
44 262 DSM-IV/V diagnosis will make comparison within and between institutions more reasonable, and  
45  
46 263 thereby learning possible.

47  
48 264 **b. Increased registration of suicide attempts in time compared to baseline**

49  
50 265 The second outcome variable in this study, is the extent to which suicide attempts are being  
51  
52 266 registered. Currently, suicide attempts are hardly registered in Dutch mental health institutions.  
53  
54 267 Monitoring and registration of suicide attempts may be one of the quality indicators improving the  
55  
56 268 quality of care for suicidal patients as a suicide attempt is an important risk factor for completed

1  
2  
3 269 suicide<sup>23</sup>. SUPRANET Care will encourage the registration of suicide attempts of patients in care.  
4  
5 270 Changes in the extent to which suicide attempts of patients are registered, will be analyzed with the  
6  
7 271 suicide attempt data that is monitored biannually in the national SUPRANET database. We  
8  
9 272 hypothesize that SUPRANET Care will lead to increased registration of suicide attempts.

10  
11 273 **c. Improved mutually shared knowledge, attitude and adherence to suicide prevention**  
12  
13 274 **guidelines in time compared to baseline**

14  
15  
16 275 The third outcome variable is improved mutually shared professional knowledge, attitude and  
17  
18 276 adherence to suicide prevention guidelines compared to baseline. In order to measure the outcome, an  
19  
20 277 extended version of the PITSTOP suicide survey (Professionals In Training to STOP suicide) among  
21  
22 278 crisis teams and ambulatory care teams in each participating mental health institution will be held to  
23  
24 279 test (1) the shared knowledge of suicidal behavior and suicide prevention, (2) the attitude of healthcare  
25  
26 280 professionals towards suicidal patients and (3) adherence to the clinical practice guidelines<sup>24</sup>. This  
27  
28 281 questionnaire will be conducted in crisis teams and ambulatory care teams at baseline (before the  
29  
30 282 SUPRANET Care implementation approach) with annual repeated measurements after one, two and  
31  
32 283 three years. An improvement in shared knowledge and attitude of professionals and adherence to  
33  
34 284 guidelines is expected<sup>24</sup>.

35  
36 285 **Statistical analysis**

37  
38 286 First, the implementation progress will be analyzed. The first data collection is for the purpose of  
39  
40 287 having the baseline measurement. Outcomes on progress in implementation are assessed biannually at  
41  
42 288 the organizational, professional, and patient level using data from the national registry of SUPRANET  
43  
44 289 Care. Generalized Linear Model (GLM) repeated measures will be used to analyze if institutions  
45  
46 290 change over time on each quality indicator including registration of a contact person, waiting-list  
47  
48 291 duration and safety-plan.

49  
50 292 To test the effect of the SUPRANET Care implementation approach on the outcome variables,  
51  
52 293 Interrupted Time-Series Analysis Procedure (ITSACORR) will be conducted, designed to analyse  
53  
54 294 short time series that likely have auto correlated errors<sup>25</sup>. ITSACORR is the preferred method above  
55  
56 295 Autoregressive Integrated Moving Average (ARIMA) in relatively short time-series data<sup>26</sup>. The result

1  
2  
3 296 is a “repeated time series” that, unlike pre- and post-intervention means or percentage difference tests,  
4  
5 297 enables investigation of the pattern of change over time and include its mean level (the average of all  
6  
7 298 time points) and changes in its slope<sup>25</sup>. To strengthen this uncontrolled study design, health care  
8  
9 299 organizations’ level of implementation is added to the study. If organizations with better, or greater  
10  
11 300 number of, implemented quality indicators show greater change in the outcomes, it strengthens the  
12  
13 301 argument that the SUPRANET Care approach led to the changes.

### 14 15 302 **Patient and public involvement**

16  
17  
18 303 A member of the clients’ advisory board participates in the board of the SUPRANET Care  
19  
20 304 Foundation. Experts with experiences in suicidal behavior are involved in the development of  
21  
22 305 SUPRANET GGZ: in the Delphi study to create useful quality indicators for implementation.  
23  
24 306 Furthermore, they actively participate in the workgroups: the Quality of Care Group and the  
25  
26 307 Registration Group, in which professionals recruited from the participant organizations participate.  
27  
28 308 Results of the study will be disseminated to the study participants, through feedback reports,  
29  
30 309 presentations and messages on our website ([www.supranetggz.nl](http://www.supranetggz.nl)).

### 31 32 310 **Discussion**

33  
34 311 This paper describes the study protocol of a longitudinal study investigating the activities of  
35  
36 312 SUPRANET Care by examining its feasibility and impact in a network formed by thirteen specialist  
37  
38 313 mental health care institutions. It will be the first study worldwide to report on the results of a  
39  
40 314 confidential learning network approach in suicide prevention. We expect that SUPRANET Care will  
41  
42 315 improve shared knowledge of professionals, increase the registration of suicide attempts and decrease  
43  
44 316 suicide rates in Dutch mental health care.

45  
46 317 Suicide is the worst outcome of mental illness. Recent evidence shows that suicide prevention  
47  
48 318 in mental health care can be enhanced considerably by creating a culture that puts patient and staff  
49  
50 319 safety first; and by systematically improving the quality and organization of care<sup>8,9</sup>. This involves the  
51  
52 320 implementation of guideline best practices addressing contextual barriers and facilitators at different  
53  
54 321 levels; continually addressing targeted quality and safety issues using plan-do-check-act cycles. Given  
55  
56 322 the low base rate of suicides and suicide attempts, large and longitudinal databases are needed to



1  
2  
3 323 assess the impact of quality improvement and guideline best practice implementation. The  
4  
5 324 SUPRANET Care program contains these elements and may prove to be a successful new approach to  
6  
7 325 enhance suicide prevention in mental health care.

8  
9 326 Strength of the study is that SUPRANET Care is a bottom-up initiative covering almost half of  
10  
11 327 the large mental health care organizations in the Netherlands, with a clear ambition to work together to  
12  
13 328 improve guideline implementation, suicide prevention and quality of care in Dutch mental health  
14  
15 329 settings. Also, experts with experiences in suicidal behavior are involved in the organization of  
16  
17 330 SUPRANET Care.

18  
19 331 A limitation of our study is the aggregation of the collected patient and treatment data to  
20  
21 332 protect the privacy of patients and SUPRANET Care nor the data-analyst is thus able to decrypt  
22  
23 333 personal patient information to follow patients in time. However, for feedback reports and our  
24  
25 334 implementation and study goals, the aggregated data appear sufficient.

26  
27 335 SUPRANET Care is a unique project worldwide. When successful, all Dutch mental health  
28  
29 336 settings will be invited to join SUPRANET and to include the quality indicators into their policy for  
30  
31 337 suicide prevention. As the results will be of high relevance for countries in and outside of Europe, the  
32  
33 338 implementation approach of SUPRANET Care, and the gained knowledge of the evaluation study will  
34  
35 339 be shared with an international audience.

36  
37 340 **Acknowledgments:** The authors would like to thank all thirteen specialist mental health institutions  
38  
39 341 for their efforts and participation in the SUPRANET Care network. Thanks to the suicide experts,  
40  
41 342 SUPRANET board, members of the clients' advisory board, the work- and project groups for their  
42  
43 343 involvement in the organization of SUPRANET Care.

44  
45 344 **Author Contributions:** All authors contributed to the design of the study. KS drafted the manuscript.  
46  
47 345 JK, AB, GF, IV, DD, ME and RG made critical revisions to and edited the manuscript. All authors  
48  
49 346 contributed to and approved the final manuscript.

50  
51  
52 347 **Competing interests statement:** The authors declare no competing interests to disclose.

53  
54 348 **Funding statement:**



1  
2  
3 349 This study is funded by the Ministry of Health Funding-program for Health Care Efficiency Research  
4  
5 350 ZonMw (537001006). ZonMw is not involved in the design of the study and does not participate in the  
6  
7 351 data collection, analysis of the data and writing of the manuscript.  
8  
9 352

## 353 References

- 354 1. O'Connor RC, Nock MK. The psychology of suicidal behaviour. *Lancet Psychiatry*  
355 2014;1(1):73-85. doi: 10.1016/S2215-0366(14)70222-6
- 356 2. Hoertel N, Le Strat Y, Lavaud P, et al. Generalizability of clinical trial results for bipolar  
357 disorder to community samples: findings from the National Epidemiologic Survey on  
358 Alcohol and Related Conditions. *J Clin Psychiatry* 2013;74(3):265-70. doi:  
359 10.4088/JCP.12m07935
- 360 3. Lönnqvist J. Major psychiatric disorders in suicide and suicide attempters. *Oxford textbook*  
361 *of suicidology and suicide prevention: A global perspective* 2009:275-86.
- 362 4. Forkmann T, Brahler E, Gauggel S, et al. Prevalence of suicidal ideation and related risk  
363 factors in the German general population. *J Nerv Ment Dis* 2012;200(5):401-5. doi:  
364 10.1097/NMD.0b013e31825322cf
- 365 5. Rihmer Z. Suicide risk in mood disorders. *Curr Opin Psychiatry* 2007;20(1):17-22. doi:  
366 10.1097/YCO.0b013e3280106868
- 367 6. Organization WH. Preventing suicide: a global  
368 imperative. [www.who.int/mental\\_health/suicide-prevention/world\\_report\\_2014/en/](http://www.who.int/mental_health/suicide-prevention/world_report_2014/en/) (14)  
369 Accessed March 17.
- 370 7. Huisman A, Robben PB, Kerkhof AJ. An examination of the Dutch Health Care  
371 Inspectorate's supervision system for suicides of mental health care users. *Psychiatr*  
372 *Serv* 2009;60(1):80-5. doi: 10.1176/appi.ps.60.1.80  
373 10.1176/ps.2009.60.1.80 [published Online First: 2008/12/31]
- 374 8. While D, Bickley H, Roscoe A, et al. Implementation of mental health service  
375 recommendations in England and Wales and suicide rates, 1997-2006: a cross-  
376 sectional and before-and-after observational study. *Lancet* 2012;379(9820):1005-12.  
377 doi: 10.1016/S0140-6736(11)61712-1
- 378 9. Kapur N, Ibrahim S, While D, et al. Mental health service changes, organisational factors,  
379 and patient suicide in England in 1997-2012: a before-and-after study. *The Lancet*  
380 *Psychiatry* 2016;3(6):526-34.
- 381 10. van Hemert A, Kerkhof A, de Keijser B, et al. Multidisciplinaire richtlijn Diagnostiek en  
382 Behandeling van Suïcidaal Gedrag [Multidisciplinary guideline Diagnostics and  
383 Treatment of Suicidal Behavior]. *Utrecht: De Tijdstroom* 2012
- 384 11. Mokkenstorm J. Results of a monitor based dialogue approach to support the  
385 implementation of suicide prevention according to guidelines in specialist mental  
386 health care in the Netherlands. Manuscript in preparation. . 2017
- 387 12. de Beurs DP, de Groot MH, de Keijser J, et al. Evaluation of benefit to patients of training  
388 mental health professionals in suicide guidelines: cluster randomised trial. *Br J*  
389 *Psychiatry* 2016;208(5):477-83. doi: 10.1192/bjp.bp.114.156208
- 390 13. Cochrane LJ, Olson CA, Murray S, et al. Gaps between knowing and doing:  
391 understanding and assessing the barriers to optimal health care. *J Contin Educ*  
392 *Health Prof* 2007;27(2):94-102. doi: 10.1002/chp.106
- 393 14. Grol R, Grimshaw J. From best evidence to best practice: effective implementation of  
394 change in patients' care. *Lancet* 2003;362(9391):1225-30. doi: 10.1016/S0140-  
395 6736(03)14546-1
- 396 15. Healthcare Inspectorate I. Overzicht van het aantal suïcides en suïcidepogingen met  
397 ernstig letsel tot gevolg binnen de ggz-instellingen.  
398 <https://www.igz.nl/onderwerpen/publieke-en-geestelijke->

- 1  
2  
3 399 gezondheidszorg/geestelijke\_gezondheidszorg/cijfers\_over\_suicides\_ggz/ (2017).  
4 400 Accessed Feb 2017
- 5 401 16. Hawton K, Pirkis J. Suicide is a complex problem that requires a range of prevention  
6 402 initiatives and methods of evaluation. *Br J Psychiatry* 2017;210(6):381-83. doi:  
7 403 10.1192/bjp.bp.116.197459 [published Online First: 2017/06/03]
- 8 404 17. Mokkenstorm J, Franx G, Gilissen R, et al. Suicide Prevention Guideline Implementation  
9 405 in Specialist Mental Healthcare Institutions in The Netherlands. *Int J Environ Res*  
10 406 *Public Health* 2018;15(5) doi: 10.3390/ijerph15050910 [published Online First:  
11 407 2018/05/13]
- 12 408 18. van de Klundert N, Holman R, Dongelmans DA, et al. Data Resource Profile: the Dutch  
13 409 National Intensive Care Evaluation (NICE) Registry of Admissions to Adult Intensive  
14 410 Care Units. *Int J Epidemiol* 2015;44(6):1850-50h. doi: 10.1093/ije/dyv291
- 15 411 19. de Keizer N, de Jonge E. National IC Evaluation (NICE): a Dutch quality control system.  
16 412 *J ICU management* 2005;3:62-64.
- 17 413 20. Van Leersum NJ, Snijders HS, Henneman D, et al. The Dutch surgical colorectal audit.  
18 414 *Eur J Surg Oncol* 2013;39(10):1063-70. doi: 10.1016/j.ejso.2013.05.008
- 19 415 21. van Dijk MK, Oosterbaan DB, Verbraak MJ, et al. Effectiveness of the implementation of  
20 416 guidelines for anxiety disorders in specialized mental health care. *Acta Psychiatr*  
21 417 *Scand* 2015;132(1):69-80. doi: 10.1111/acps.12338
- 22 418 22. Israëls A. Standaardisatiemethoden. . *Centraal Bureau voor de Statistiek: Den*  
23 419 *Haag/Heerlen* 2010
- 24 420 23. Hawton K, Casanas ICC, Haw C, et al. Risk factors for suicide in individuals with  
25 421 depression: a systematic review. *J Affect Disord* 2013;147(1-3):17-28. doi:  
26 422 10.1016/j.jad.2013.01.004 [published Online First: 2013/02/16]
- 27 423 24. de Beurs DP, de Groot MH, de Keijser J, et al. The effect of an e-learning supported  
28 424 Train-the-Trainer programme on implementation of suicide guidelines in mental health  
29 425 care. *J Affect Disord* 2015;175:446-53. doi: 10.1016/j.jad.2015.01.046
- 30 426 25. Biglan A, Ary D, Wagenaar AC. The value of interrupted time-series experiments for  
31 427 community intervention research. *Prev Sci* 2000;1(1):31-49.
- 32 428 26. Crosbie J. Interrupted time-series analysis with brief single-subject data. *J Consult Clin*  
33 429 *Psychol* 1993;61(6):966-74.

430
