# Supplementary material for: Feasibility and impact of data-driven learning within the suicide prevention action network of thirteen specialist mental healthcare institutions (SUPRANET Care) in the Netherlands: a study protocol
Source: PubMed Central journal article supplement — BMJ Open. 2018 Aug 20;8(8):e024398. doi: 10.1136/bmjopen-2018-024398 (PMC6104797; doi:10.1136/bmjopen-2018-024398), 2018-08-20
Supplement: bmjopen-2018-024398.reviewer_comments.pdf [file bmjopen-2018-024398.reviewer_comments.pdf]

## PEER REVIEW HISTORY

BMJ Open publishes all reviews undertaken for accepted manuscripts. Reviewers are asked to complete a checklist review form (<http://bmjopen.bmj.com/site/about/resources/checklist.pdf>) and are provided with free text boxes to elaborate on their assessment. These free text comments are reproduced below.

## ARTICLE DETAILS

|                            |                                                                                                                                                                                                        |
|----------------------------|--------------------------------------------------------------------------------------------------------------------------------------------------------------------------------------------------------|
| <b>TITLE (PROVISIONAL)</b> | Feasibility and impact of data-driven learning within the suicide prevention action network of thirteen specialist mental healthcare institutions (SUPRANET Care) in the Netherlands: A study protocol |
| <b>AUTHORS</b>             | Setkowski, Kim; Mokkenstorm, Jan; van Balkom, Anton; Franx, Gerdien; Verbeek- van Noord, Inge; Dongelmans, Dave; Eikelenboom, Merijn; Gilissen, Renske                                                 |

This article was not externally reviewed at BMJ Open. Protocols that have been independently assessed prior to submission to BMJ Open are usually fast-tracked to publication on the grounds that further substantial changes will not be possible. This independent assessment will usually be external, independent review for both a substantial grant award from a non-commercial or government funder and ethics approval.
